# Supplementary material for: Hydrothermal reduction of three-dimensional graphene oxide for binder-free flexible supercapacitors
Source: Royal Society of Chemistry journal article supplement (doi:10.1039/c4ta01547a), 2014-01-01
Supplement: c4ta01547a1.pdf [file c4ta01547a1.pdf]

Electronic supplementary information for

## Hydrothermal reduction of three-dimensional graphene oxide for binder-free flexible supercapacitors

Ji-Lei Shi, Wen-Cheng Du, Ya-Xia Yin, Yu-Guo Guo\* and Li-Jun Wan\*

CAS Key Laboratory of Molecular Nanostructure and Nanotechnology, and Beijing  
National Laboratory for Molecular Sciences, Institute of Chemistry, Chinese  
Academy of Sciences (CAS), Beijing 100190, P.R. China.

\*Email: ygguo@iccas.ac.cn

### Experimental section

#### *Synthesis of graphene oxide (GO) and three-dimensional (3D) reduced graphene oxide*

Graphene oxide was prepared by a modified Hummers method as reported elsewhere [1]. Briefly, graphite (5.0g) was added to concentrated sulfuric acid (115 ml) under stirring at room temperature; then adding sodium nitrate (2.5 g), and then the mixture was cooled to 0 °C by immersed in ice-water bath. In order to keep the temperature of the system lower than 20 °C, potassium permanganate (9.0 g) was added slowly to the system under vigorous agitation. Successively, the reaction system was transferred to a 35 °C water bath for about 2 h, then 400ml of water and 20 ml of H<sub>2</sub>O<sub>2</sub> (30%) was added together to the system, and then vigorous agitation for about 1 h. The mixture was filtered and washed with 5% HCl aqueous solution (2000 ml) followed by repeated washing with water to remove the acid. The resulting solid was dispersed in water by ultrasonication for about to make a GO aqueous dispersion (2 g/L).

Three-dimensional (3D) reduced graphene oxide (rGO) and H-rGO can be easily prepared using traditional and modified hydrothermal reduction method respectively.

Briefly, 50 ml of 2 g/L GO aqueous dispersion was sealed in a Teflon-lined autoclave and maintained at 150 °C for 5 h, then the autoclave was cooled to room temperature, and then take out the as-prepared three-dimensional (3D) rGO hydrogel. 3ml of 1M hydrochloric acid aqueous solution was added into 50 ml of 2 g/L GO aqueous dispersion under vigorous agitation for about 0.5 h, next, as mentioned above, sealed in a Teflon-lined autoclave and maintained at 150 °C for 5 h, then the autoclave was cooled to room temperature, and then take out the as-prepared three-dimensional (3D) H- rGO hydrogel.

#### *Materials characterizations*

SEM (JEOL 6701 field-emission scanning electron microscope operated at 10 kV) and TEM (JEOL JEM-2100F field-emission transmission electron microscope operated at 200 kV) were used to investigate the surface structure and morphology of the as-obtained three-dimensional (3D) reduced graphene oxide rGO and H-rGO. XRD measurements were conducted using CuK $\alpha$  radiation (Rigaku D/max-2500,  $\lambda$  = 1.5405 Å). The nitrogen adsorption and desorption isotherms were obtained at 77.3 K with a Nova 2000e surface area and pore size analyzer. The specific surface area was calculated using the BET model. Raman measurements were conducted using a DXR Raman Microscope (Thermo Fisher Scientific Inc.) with a laser wavelength of 514.5 nm.

#### *Electrochemical characterizations*

The electrochemical performances of the symmetric supercapacitors were investigated using a CHI 660D electrochemistry workstation. Electrochemical impedance spectroscopy (EIS) measurements were carried out on the Autolab PG320N at room temperature.

The fabrication of the symmetric binder-free flexible supercapacitors was as follows. Hydrothermal reduction three-dimensional (3D) GO hydrogel was painted on the weighted nickel foam (area of 1.5cm by 5cm or 2.5 by 3cm ), then the hydrogel was dried by freeze-drying method, and then press nickel foam and dried materials

together with 10 Mpa pressure, finally, weight the flexible electrode. The mass loading of each electrode is about  $1.33 \text{ mg cm}^{-2}$ . Two pieces of these electrodes were assembled using Whatman GF/D glass-fiber and 6 M KOH aqueous solutions as separator and electrolyte respectively. In order to control experiments, other electrodes and supercapacitors were fabricated by the same methods.

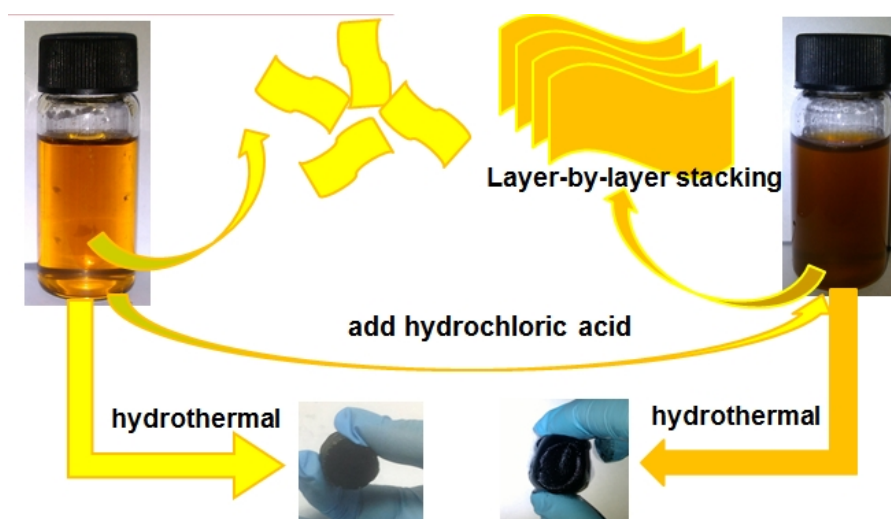

**Fig. S1** Scheme of traditional and modified hydrothermal reduction process for the preparation of three-dimensional (3D) graphene.

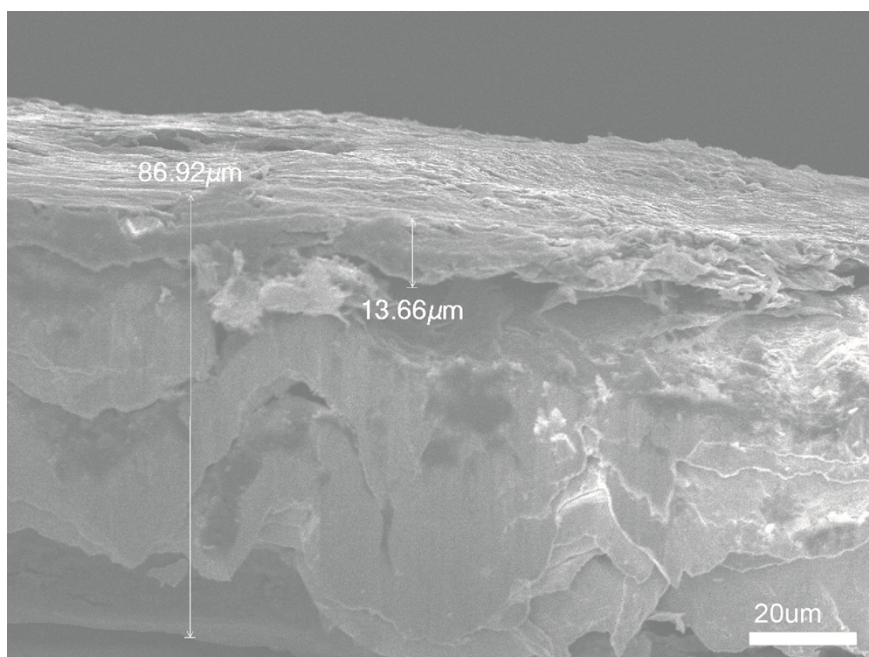

Figure S2. SEM image of the cross section of the prepared electrode

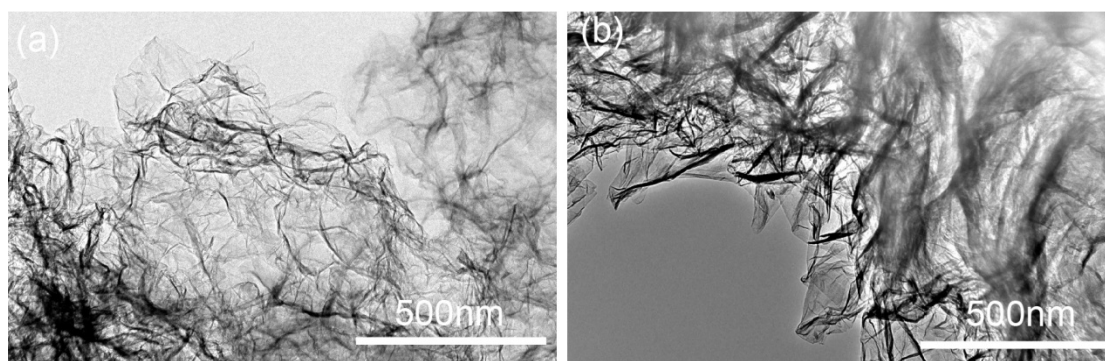

**Fig. S3** TEM images of (a) rGO, (b) H-rGO

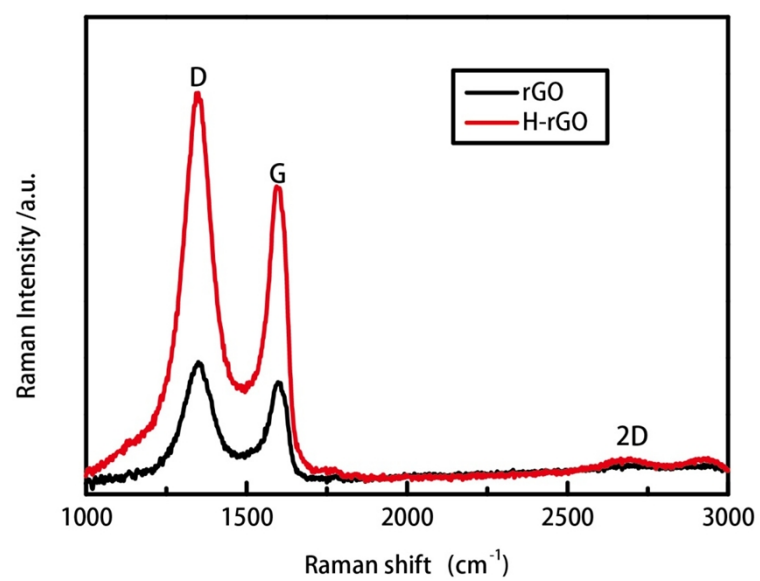

**Fig. S4** Raman spectra of rGO and H-rGO

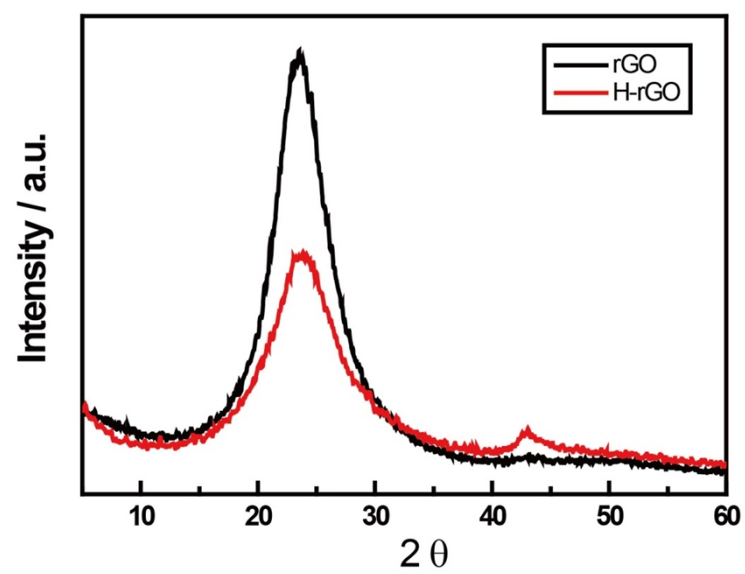

**Fig. S5** X-ray diffraction pattern of rGO and H-rGO

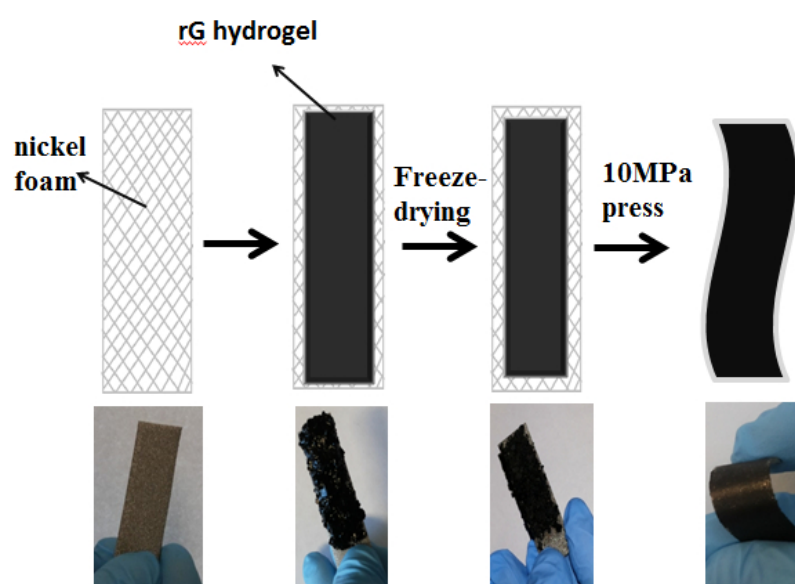

**Fig. S6** Scheme of preparing flexible binder-free electrodes.



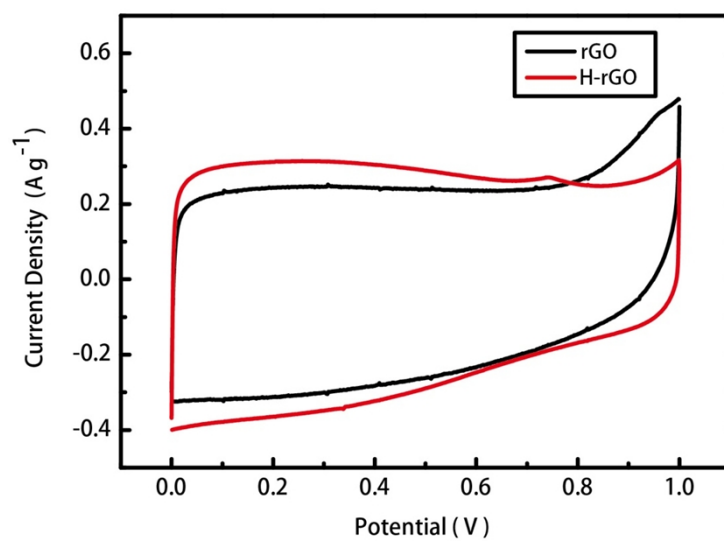

**Fig. S7** Cyclic voltammograms of rGO and H-rGO at a scan rate of 5 mV s<sup>-1</sup>.

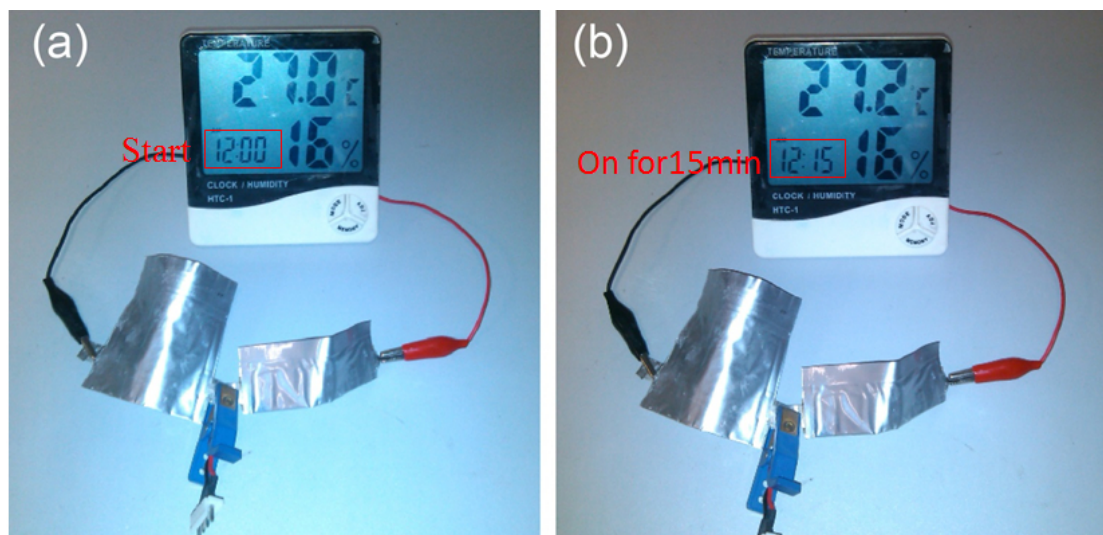

**Fig. S8** Digital images of how long the digital temperature and humidity meter can work powered by the two devices connected in series. (a) start. (b) on for 15 min.

## Reference

- [1] Hummers, W. S.; Offeman, R. E. *J. Am. Chem. Soc.* 2008, 8, 3137.
